# Supplementary material for: Spatially and Temporally Resolved Ambient PM2.5 in Relation to Preterm Birth
Source: MDPI journal article supplement (doi:10.3390/toxics9120352), 2021-12-14
Supplement: s1 [file s1]

# Supplementary Materials: Spatially and Temporally Resolved Ambient PM<sub>2.5</sub> in Relation to Preterm Birth

Whitney Cowell, Elena Colicino, Xueying Zhang, Rachel Ledyard, Heather H. Burris, Michele R. Hacker, Itai Kloog, Allan Just, Robert O. Wright and Rosalind J. Wright

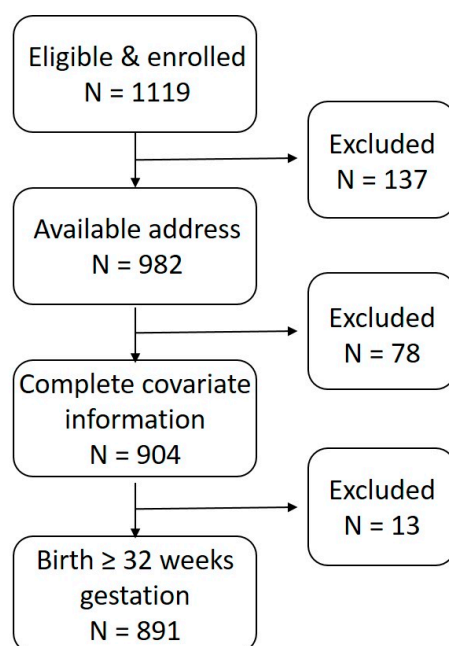

**Figure S1.** Diagram of analytic sample selection.

**Table S1.** Participant characteristics for those included in the analytic sample compared to those excluded from the analytic sample as described in Figure S1.

|                      | Included (N = 891) |     | Excluded (N = 228) |     |
|----------------------|--------------------|-----|--------------------|-----|
|                      | N (%) or mean±SD   | N   | N (%) or mean±SD   | N   |
| Maternal age         | 29.1 ± 5.8         | 891 | 28.2 ± 6.0         | 228 |
| Race/ethnicity       |                    | 891 |                    | 129 |
| White, non-Hispanic  | 147 (16.5)         |     | 6 (4.7)            |     |
| White-Hispanic       | 317 (35.6)         |     | 54 (41.9)          |     |
| Black/Black-Hispanic | 385 (43.2)         |     | 67 (51.9)          |     |
| Other                | 42 (4.7)           |     | 2 (1.6)            |     |
| Education            |                    | 891 |                    | 117 |
| <High school         | 183 (20.5)         |     | 14 (12.0)          |     |
| High school degree   | 444 (49.8)         |     | 86 (73.5)          |     |
| >High school         | 264 (29.6)         |     | 17 (14.5)          |     |
| Nulliparous          | 303 (34.0)         | 891 | 59 (33.7)          | 175 |
| Smoke exposure       | 100 (11.2)         | 891 | 32 (23.7)          | 135 |

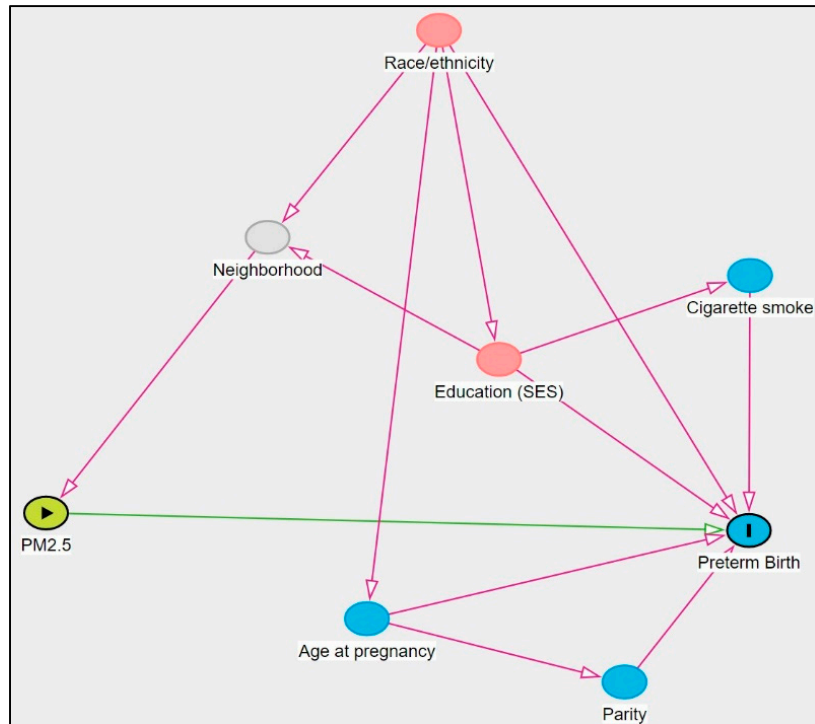

**Figure S2.** Directed Acyclic Graph of assumed conditional dependencies between the exposure, outcome, and covariates.

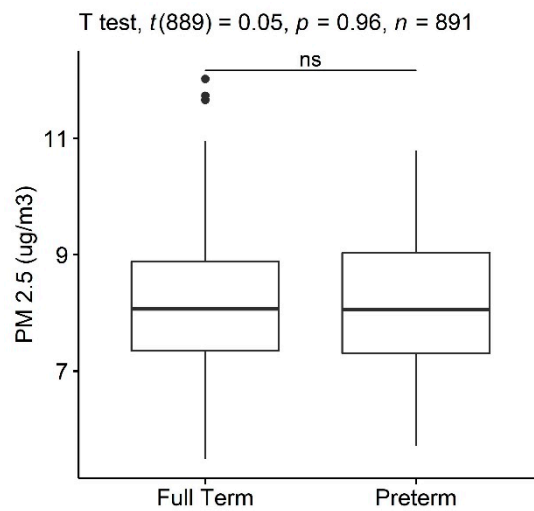

**Figure S3.** Distribution of PM<sub>2.5</sub> by preterm birth status. ns = non-significant.

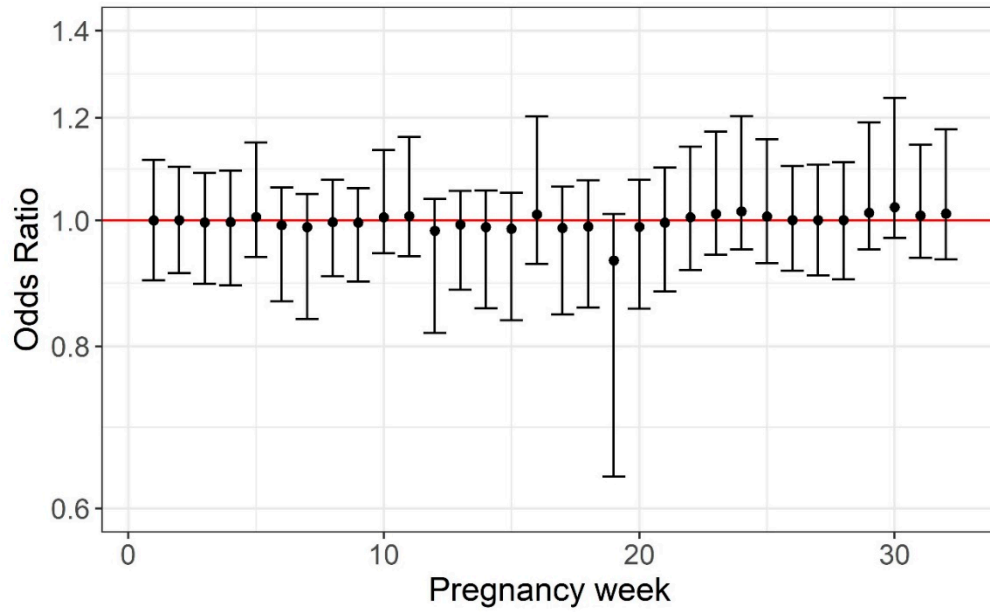

**Figure S4.** Posterior mean and 95% credible intervals from an intercept-only CWVS model examining an interquartile range increase in weekly  $PM_{2.5}$  in relation to the odds of preterm birth.

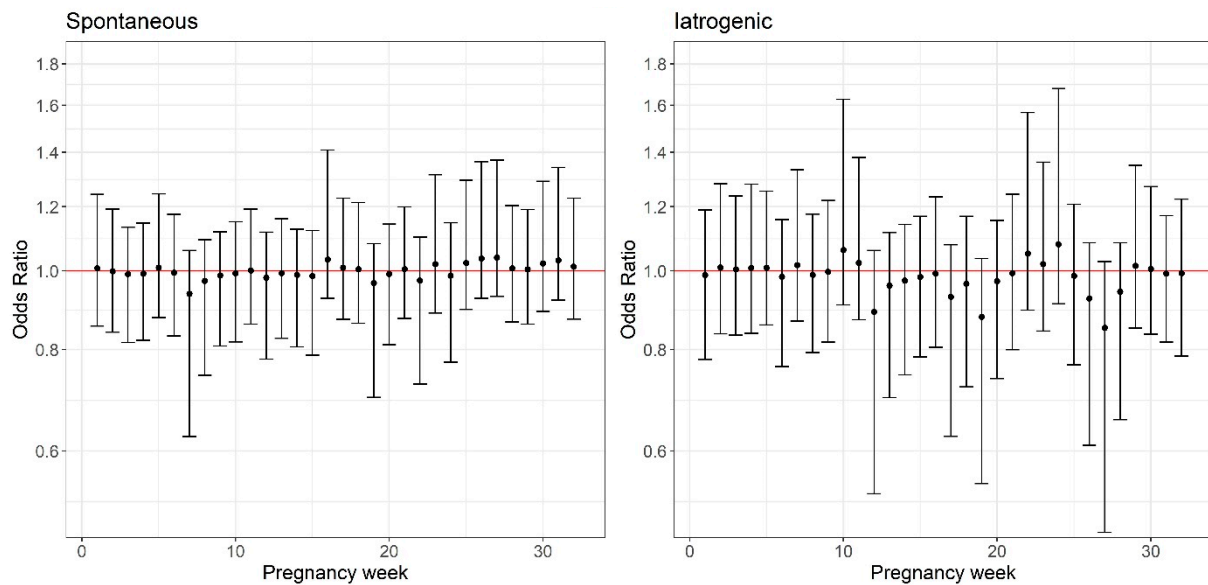

**Figure S5.** Posterior mean and 95% credible intervals from adjusted CWVS models examining an interquartile range increase in weekly  $PM_{2.5}$  in relation to the odds of preterm birth stratified by spontaneous versus iatrogenic preterm birth phenotype.

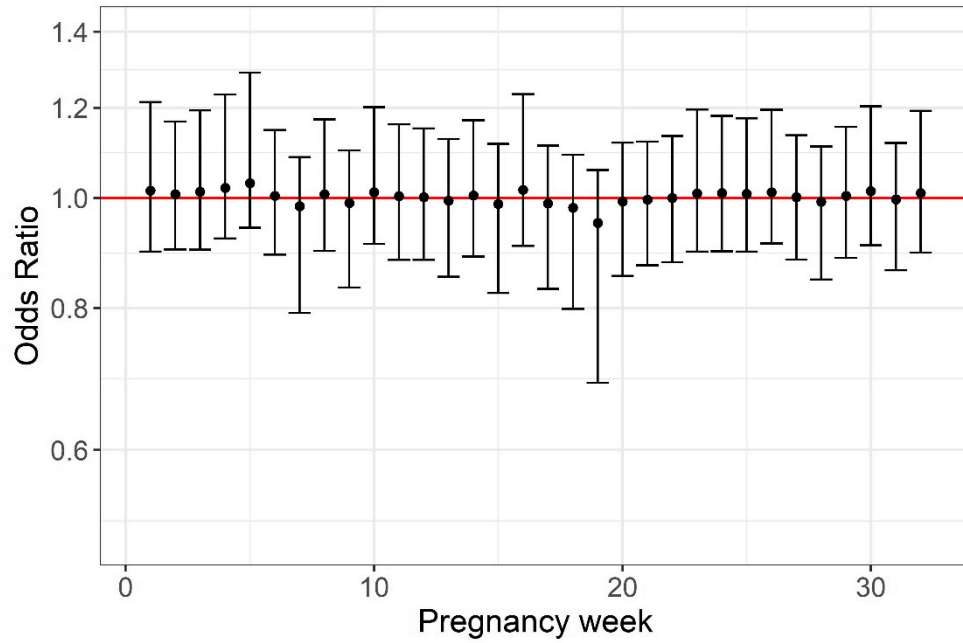

**Figure S6.** Posterior mean and 95% credible intervals from adjusted CWVS models examining an interquartile range increase in weekly  $PM_{2.5}$  in relation to the odds of preterm birth excluding participants diagnosed with gestational hypertension, pre-eclampsia/eclampsia, or gestational diabetes during pregnancy ( $N = 138$ ) and those missing information on these conditions ( $N = 45$ ).

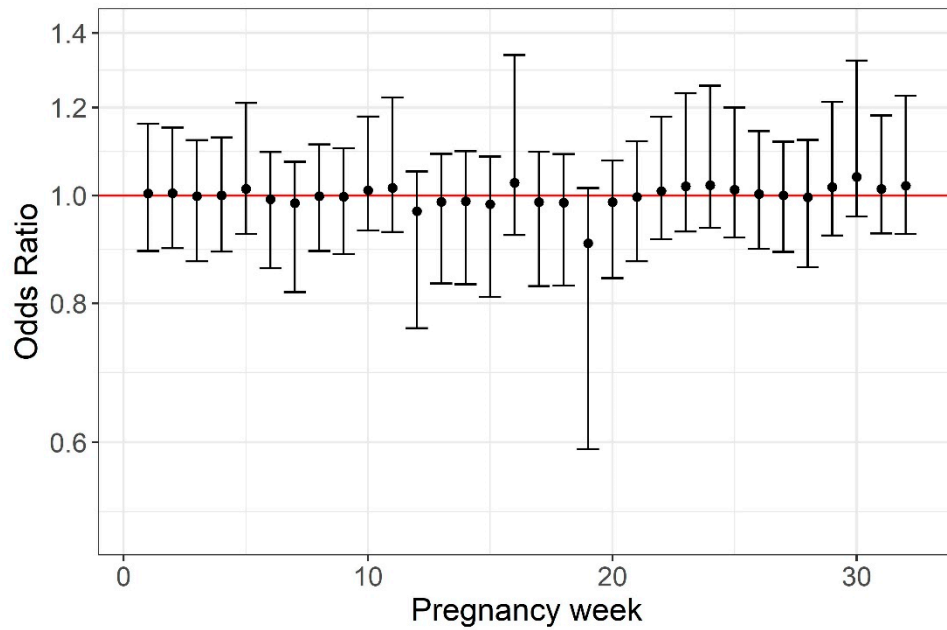

**Figure S7.** Posterior mean and 95% credible intervals from adjusted CWVS models examining an interquartile range increase in weekly  $PM_{2.5}$  in relation to the odds of preterm birth additionally adjusted for season of last menstrual period.

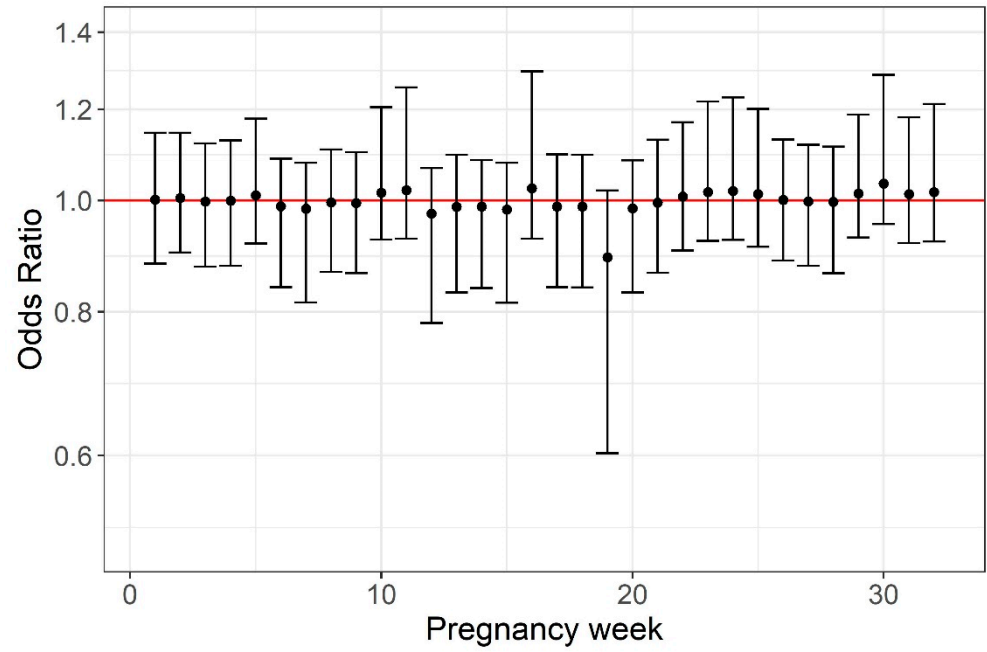

**Figure S8.** Posterior mean and 95% credible intervals from adjusted CWVS models examining an interquartile range increase in weekly PM<sub>2.5</sub> in relation to the odds of preterm birth additionally adjusted for year of birth.

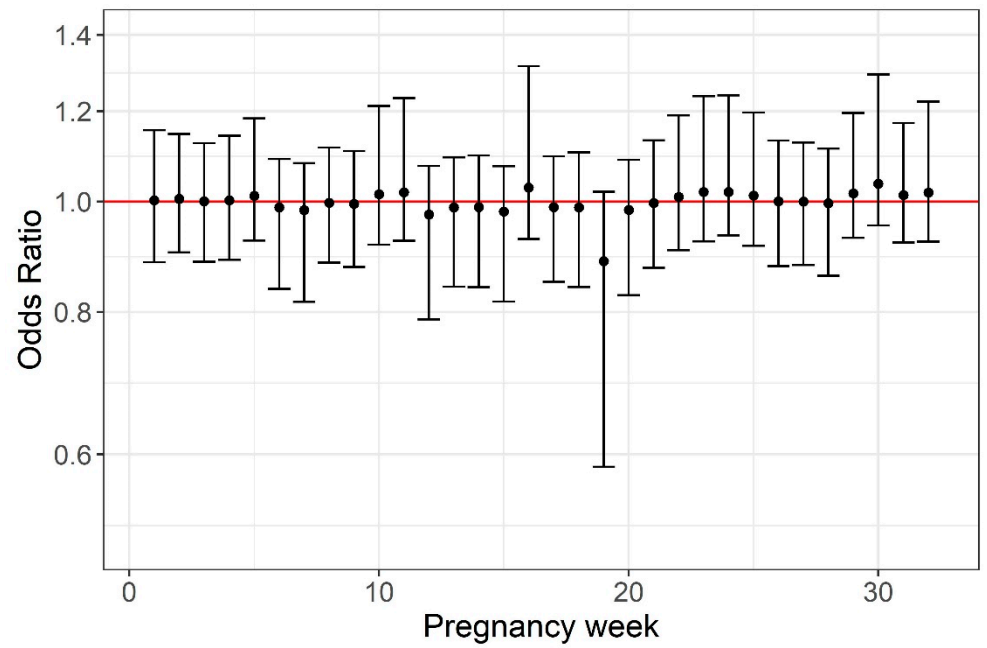

**Figure S9.** Posterior mean and 95% credible intervals from adjusted CWVS models examining an interquartile range increase in weekly PM<sub>2.5</sub> in relation to the odds of preterm birth additionally adjusted for study site (Boston vs. New York City).
